# Supplementary material for: Dynamic relational event modeling: Testing, exploring, and applying
Source: PubMed Central journal article supplement (PMC9342787; doi:10.1371/journal.pone.0272309), 2022-08-01
Supplement: pone.0272309.s001.pdf [file pone.0272309.s001.pdf]

Supporting figures for  
Dynamic relational event modeling: Testing, exploring and applying

Marlyne Meijerink-Bosman, Roger Leenders and Joris Mulder

February 22, 2022

**List of Figures**

|    |                                                  |    |
|----|--------------------------------------------------|----|
| 1  | Baseline - Results . . . . .                     | 2  |
| 2  | Baseline - Bias . . . . .                        | 3  |
| 3  | Baseline - Average estimated SE . . . . .        | 4  |
| 4  | Z of sender- Results . . . . .                   | 5  |
| 5  | Z of sender - Bias . . . . .                     | 6  |
| 6  | Z of sender - Average estimated SE . . . . .     | 7  |
| 7  | Difference in Z - Results . . . . .              | 8  |
| 8  | Difference in Z - Bias . . . . .                 | 9  |
| 9  | Difference in Z - Average estimated SE . . . . . | 10 |
| 10 | Activity - Results . . . . .                     | 11 |
| 11 | Activity - Bias . . . . .                        | 12 |
| 12 | Activity - Average estimated SE . . . . .        | 13 |
| 13 | Inertia - Results . . . . .                      | 14 |
| 14 | Inertia - Bias . . . . .                         | 15 |
| 15 | Inertia - Average estimated SE . . . . .         | 16 |
| 16 | Transitivity - Results . . . . .                 | 17 |
| 17 | Transitivity - Bias . . . . .                    | 18 |
| 18 | Transitivity - Average estimated SE . . . . .    | 19 |

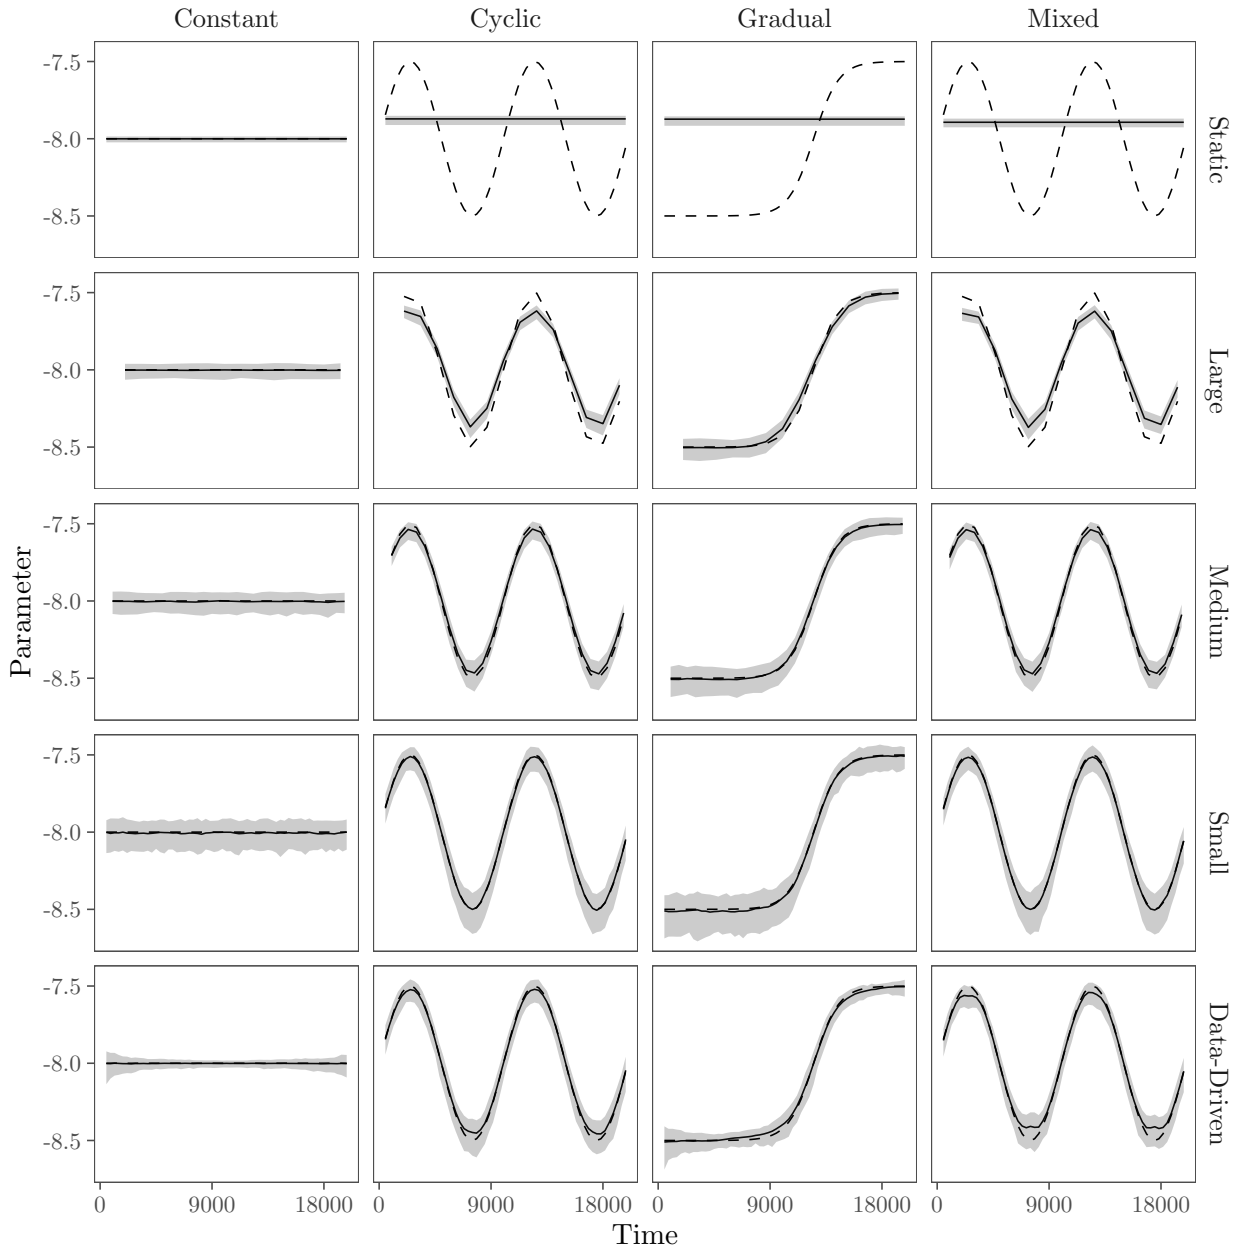

**Fig 1. Results from the evaluation of the (moving window) REM for the ‘baseline’ effect.** Rows show results for estimation of the ‘baseline’ effect with the ‘static’ REM, large (4000t), medium (2000t), small (1000t), and data-based window widths, respectively. Columns show results for estimation of the ‘baseline’ effect in the four time-varying effects scenarios. Solid lines represent the mean estimated parameters over 200 datasets over time. The gray area represents the range with 95% of the estimates for the 200 datasets. Dashed lines represent the parameters used for data generation.

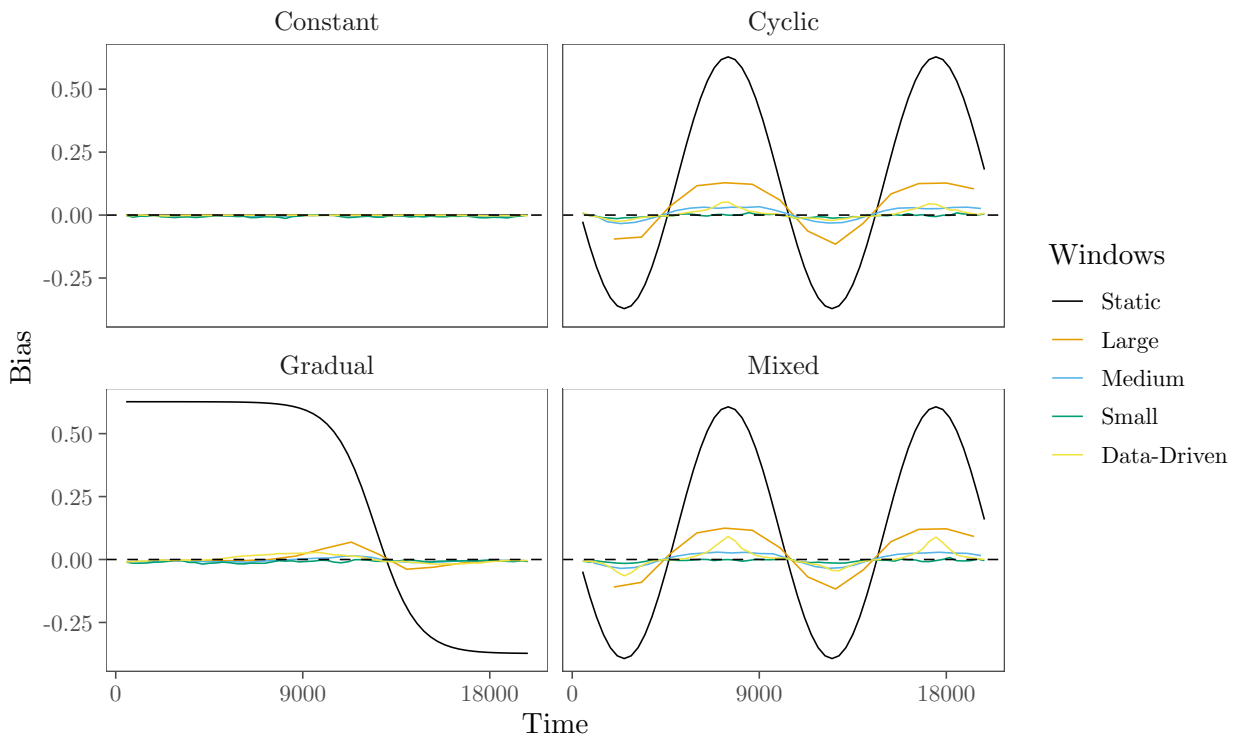

**Fig 2. Results for the ‘baseline’ effect from the evaluation of the moving window REM.** Panels refer to the four time-varying effect scenarios. Solid lines represent the bias of the parameter estimates over time, with colors representing estimation with large ( $4000t$ ), medium ( $2000t$ ), small ( $1000t$ ) and data-based window widths.

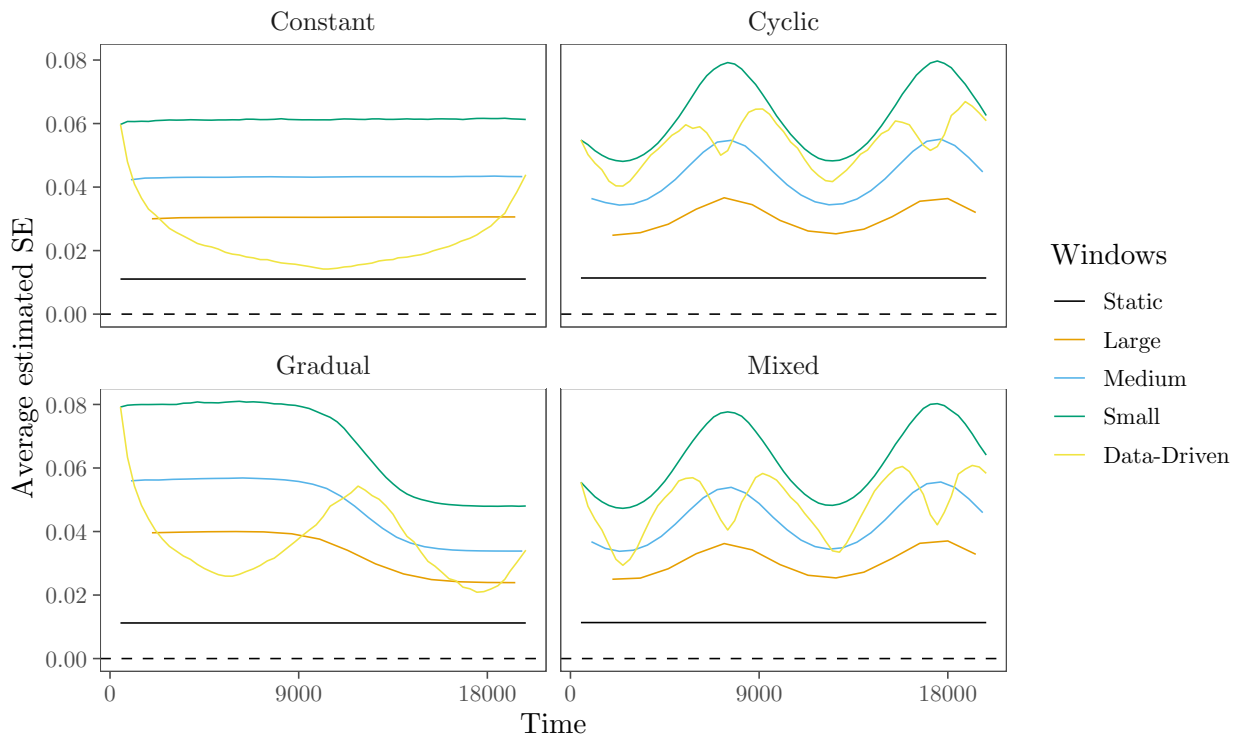

**Fig 3. Results for the ‘baseline’ effect from the evaluation of the moving window REM.** Panels refer to the four time-varying effect scenarios. Solid lines represent the average estimated standard error of the parameter estimates over time, with colors representing estimation with large ( $4000t$ ), medium ( $2000t$ ), small ( $1000t$ ) and data-based window widths.

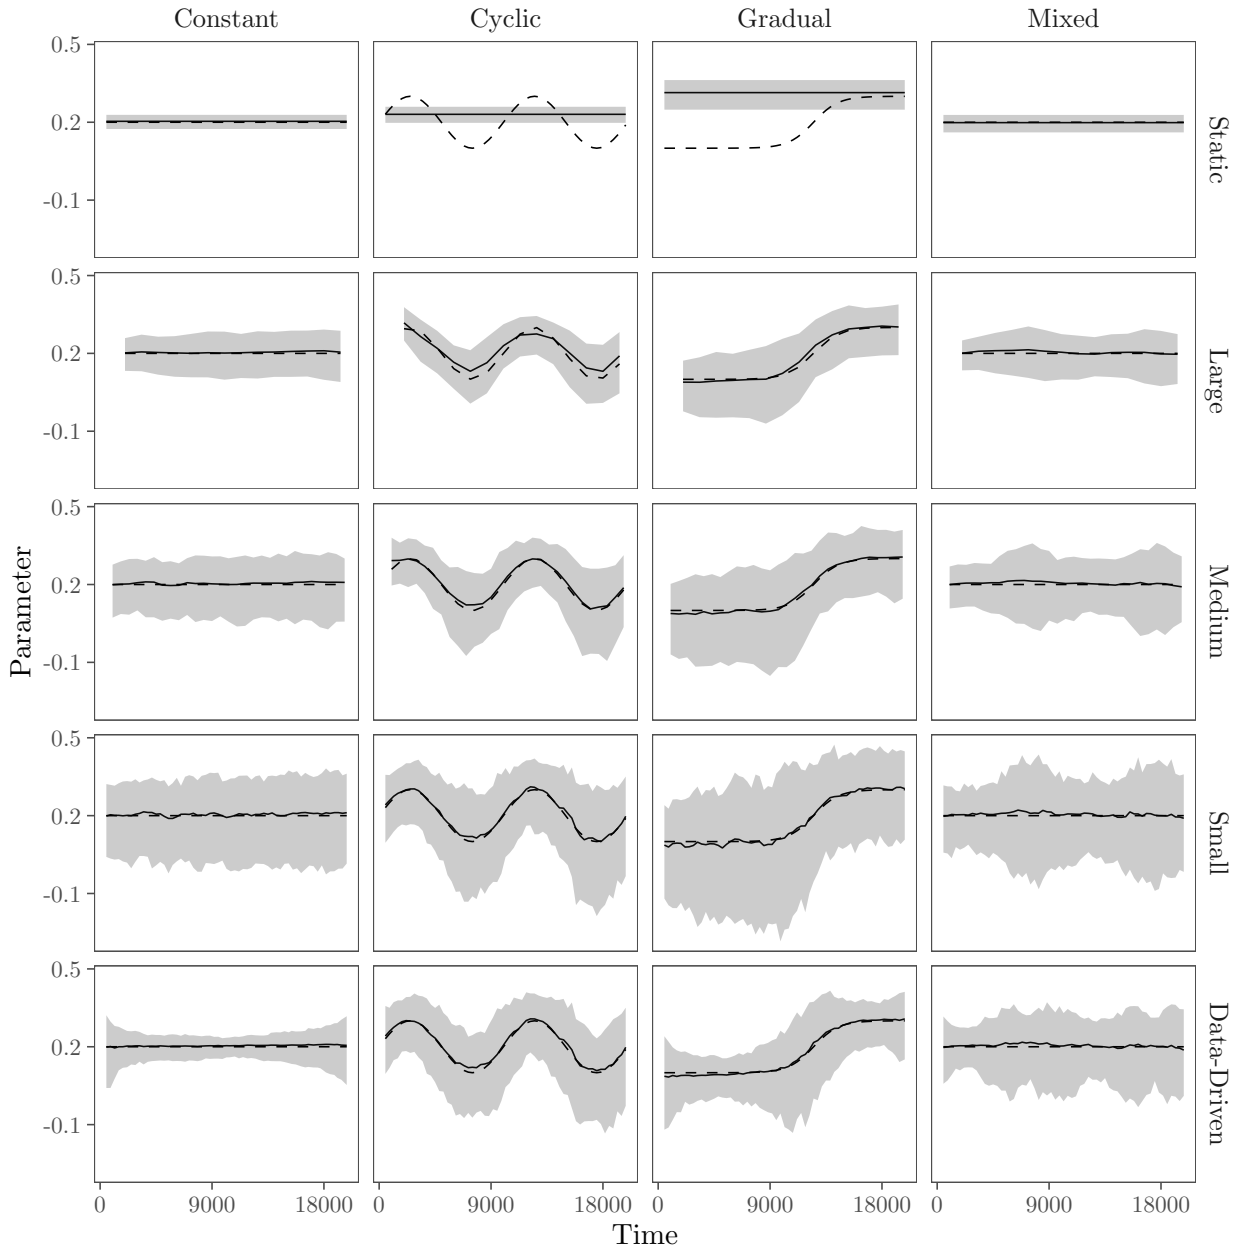

**Fig 4. Results from the evaluation of the (moving window) REM for the ‘Z of sender’ effect.** Rows show results for estimation of the ‘Z of sender’ effect with the ‘static’ REM, large ( $4000t$ ), medium ( $2000t$ ), small ( $1000t$ ), and data-based window widths, respectively. Columns show results for estimation of the ‘Z of sender’ effect in the four time-varying effects scenarios. Solid lines represent the mean estimated parameters over 200 datasets over time. The gray area represents the range with 95% of the estimates for the 200 datasets. Dashed lines represent the parameters used for data generation.

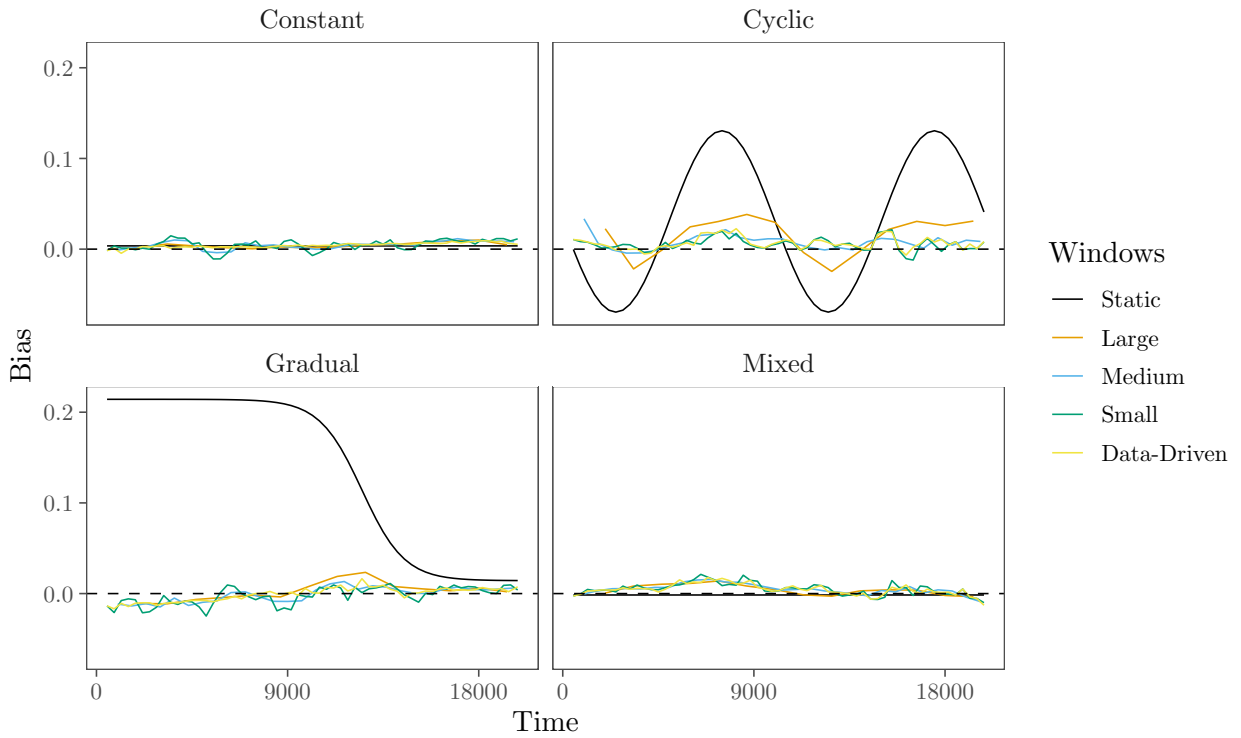

**Fig 5. Results for the ‘Z of sender’ effect from the evaluation of the moving window REM.** Panels refer to the four time-varying effect scenarios. Solid lines represent the bias of the parameter estimates over time, with colors representing estimation with large ( $4000t$ ), medium ( $2000t$ ), small ( $1000t$ ) and data-based window widths.

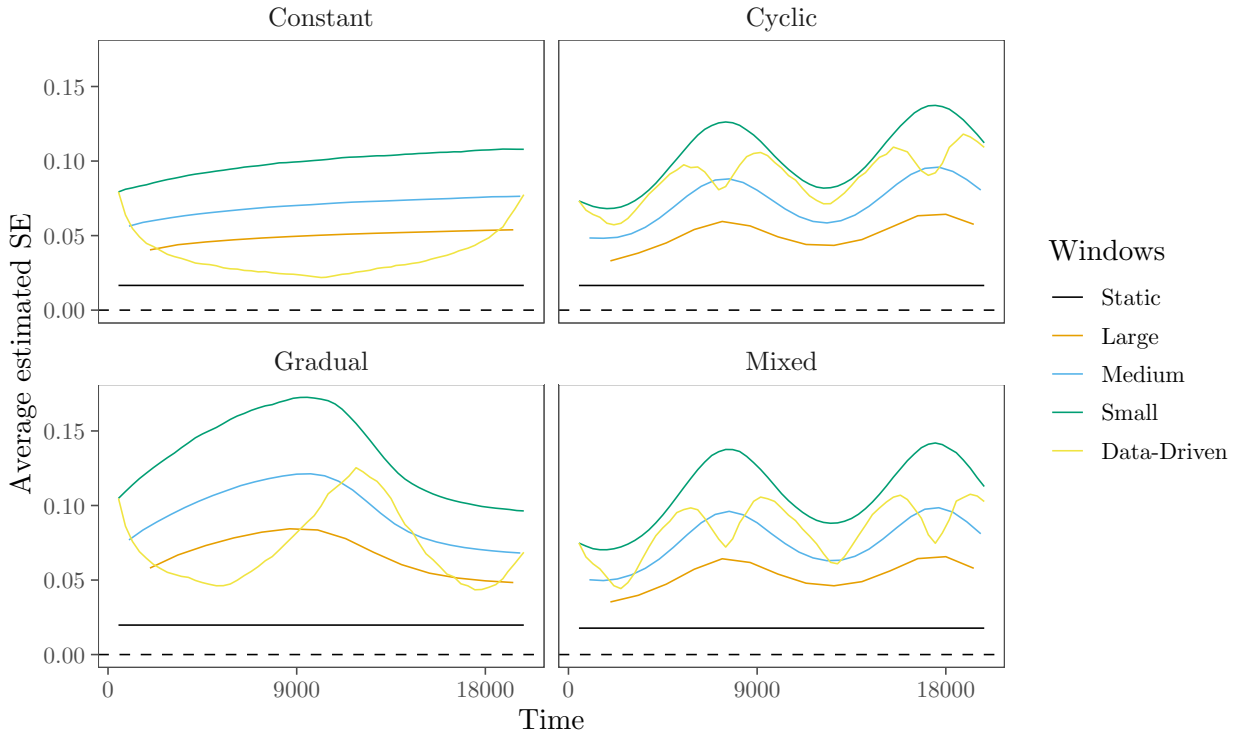

**Fig 6. Results for the ‘Z of sender’ effect from the evaluation of the moving window REM.** Panels refer to the four time-varying effect scenarios. Solid lines represent the average estimated standard error of the parameter estimates over time, with colors representing estimation with large ( $4000t$ ), medium ( $2000t$ ), small ( $1000t$ ) and data-based window widths.

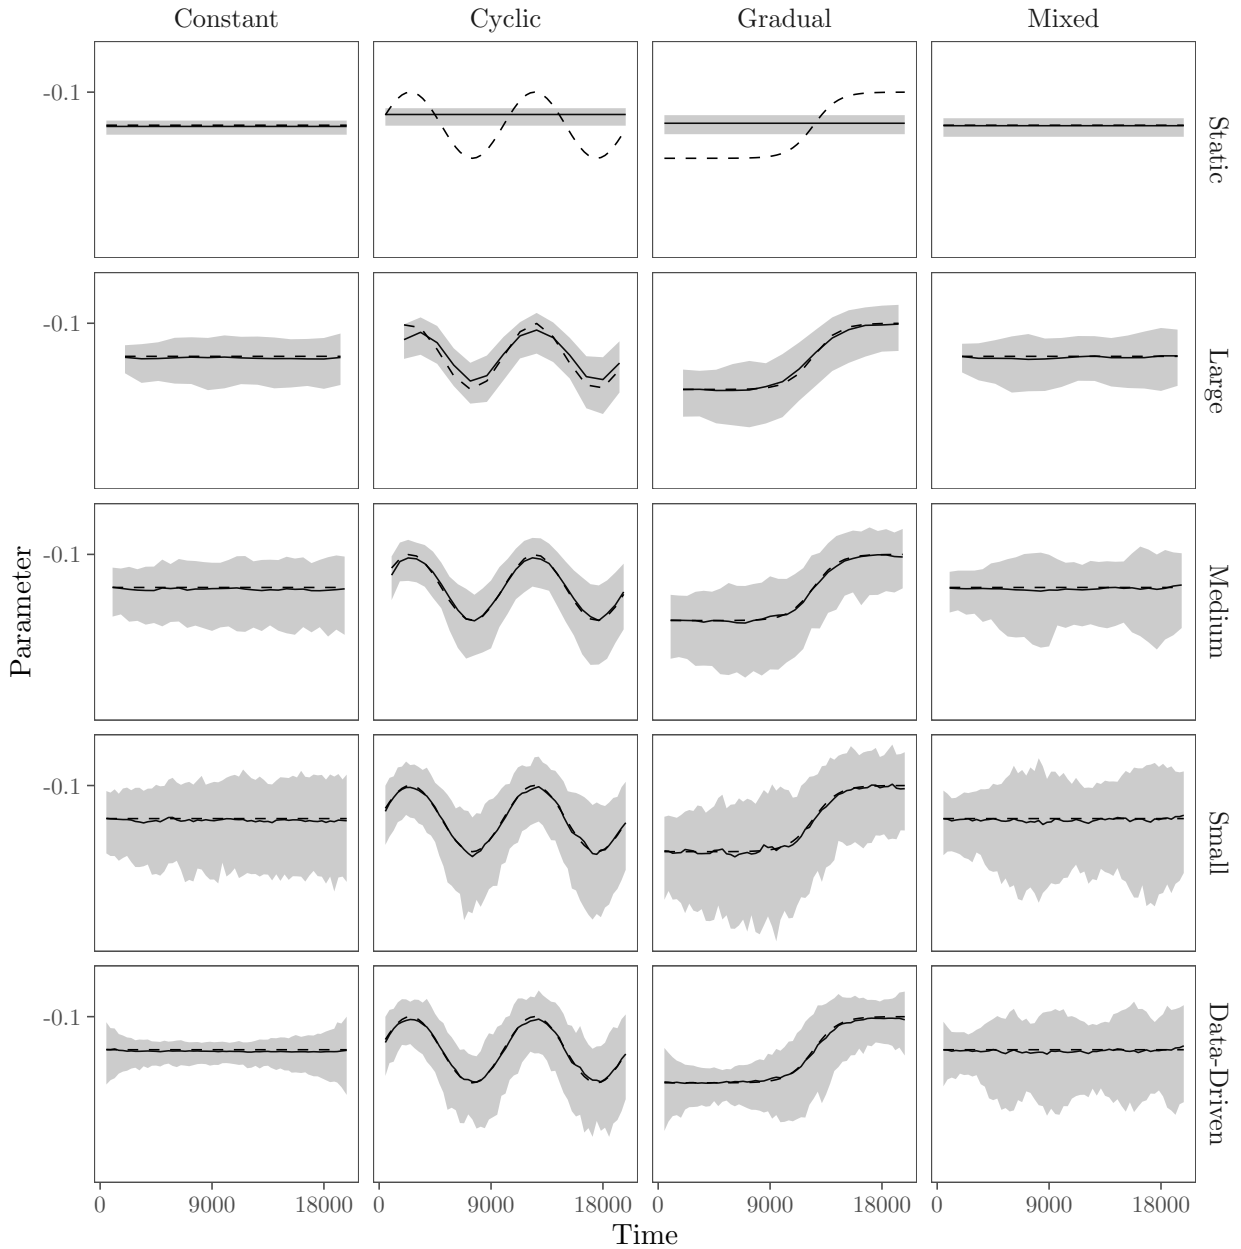

**Fig 7. Results from the evaluation of the (moving window) REM for the ‘difference in  $Z$ ’ effect.** Rows show results for estimation of the ‘difference in  $Z$ ’ effect with the ‘static’ REM, large ( $4000t$ ), medium ( $2000t$ ), small ( $1000t$ ), and data-based window widths, respectively. Columns show results for estimation of the ‘difference in  $Z$ ’ effect in the four time-varying effects scenarios. Solid lines represent the mean estimated parameters over 200 datasets over time. The gray area represents the range with 95% of the estimates for the 200 datasets. Dashed lines represent the parameters used for data generation.



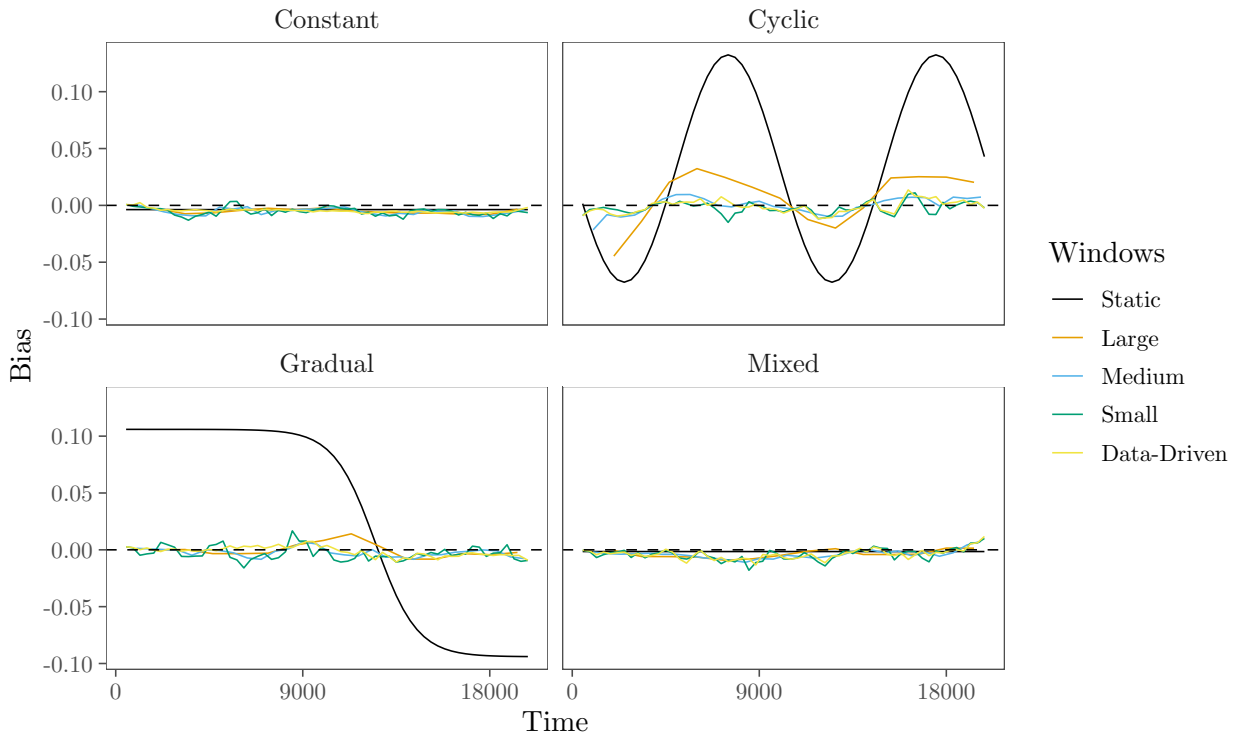

**Fig 8. Results for the ‘Difference in Z’ effect from the evaluation of the moving window REM.** Panels refer to the four time-varying effect scenarios. Solid lines represent the bias of the parameter estimates over time, with colors representing estimation with large ( $4000t$ ), medium ( $2000t$ ), small ( $1000t$ ) and data-based window widths.

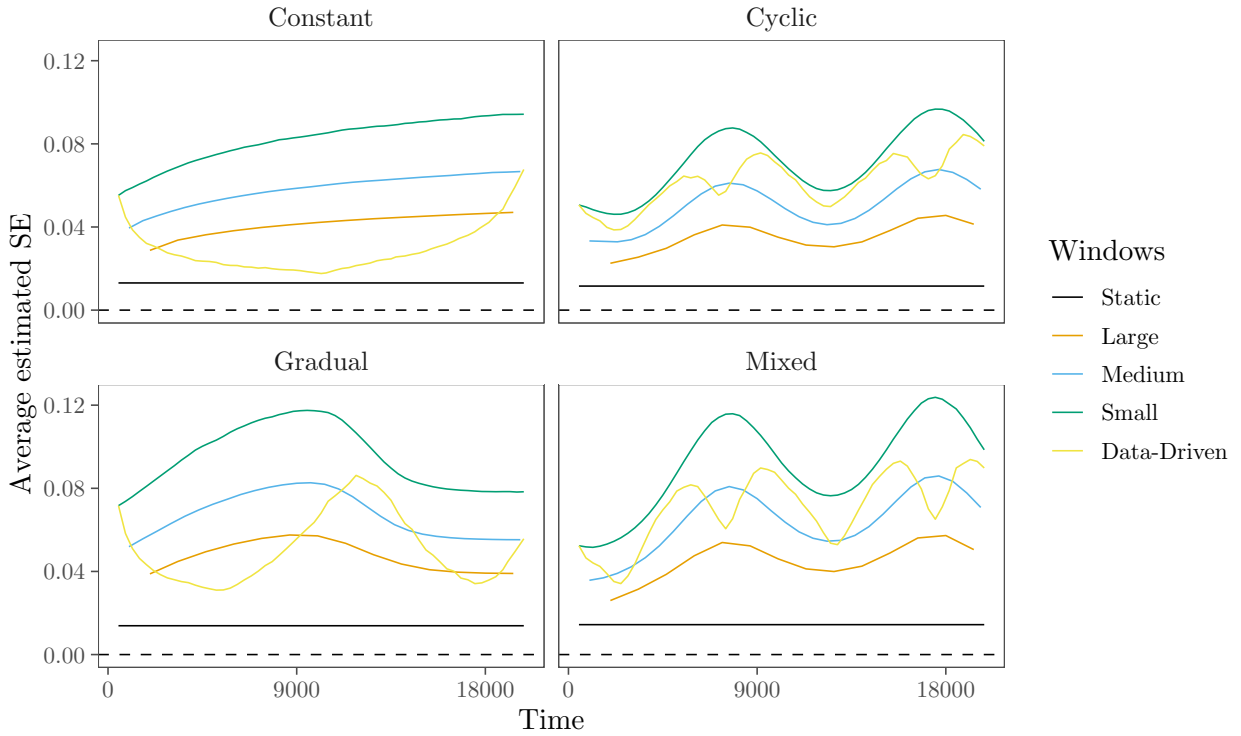

**Fig 9. Results for the ‘Difference in Z’ effect from the evaluation of the moving window REM.** Panels refer to the four time-varying effect scenarios. Solid lines represent the average estimated standard error of the parameter estimates over time, with colors representing estimation with large ( $4000t$ ), medium ( $2000t$ ), small ( $1000t$ ) and data-based window widths.

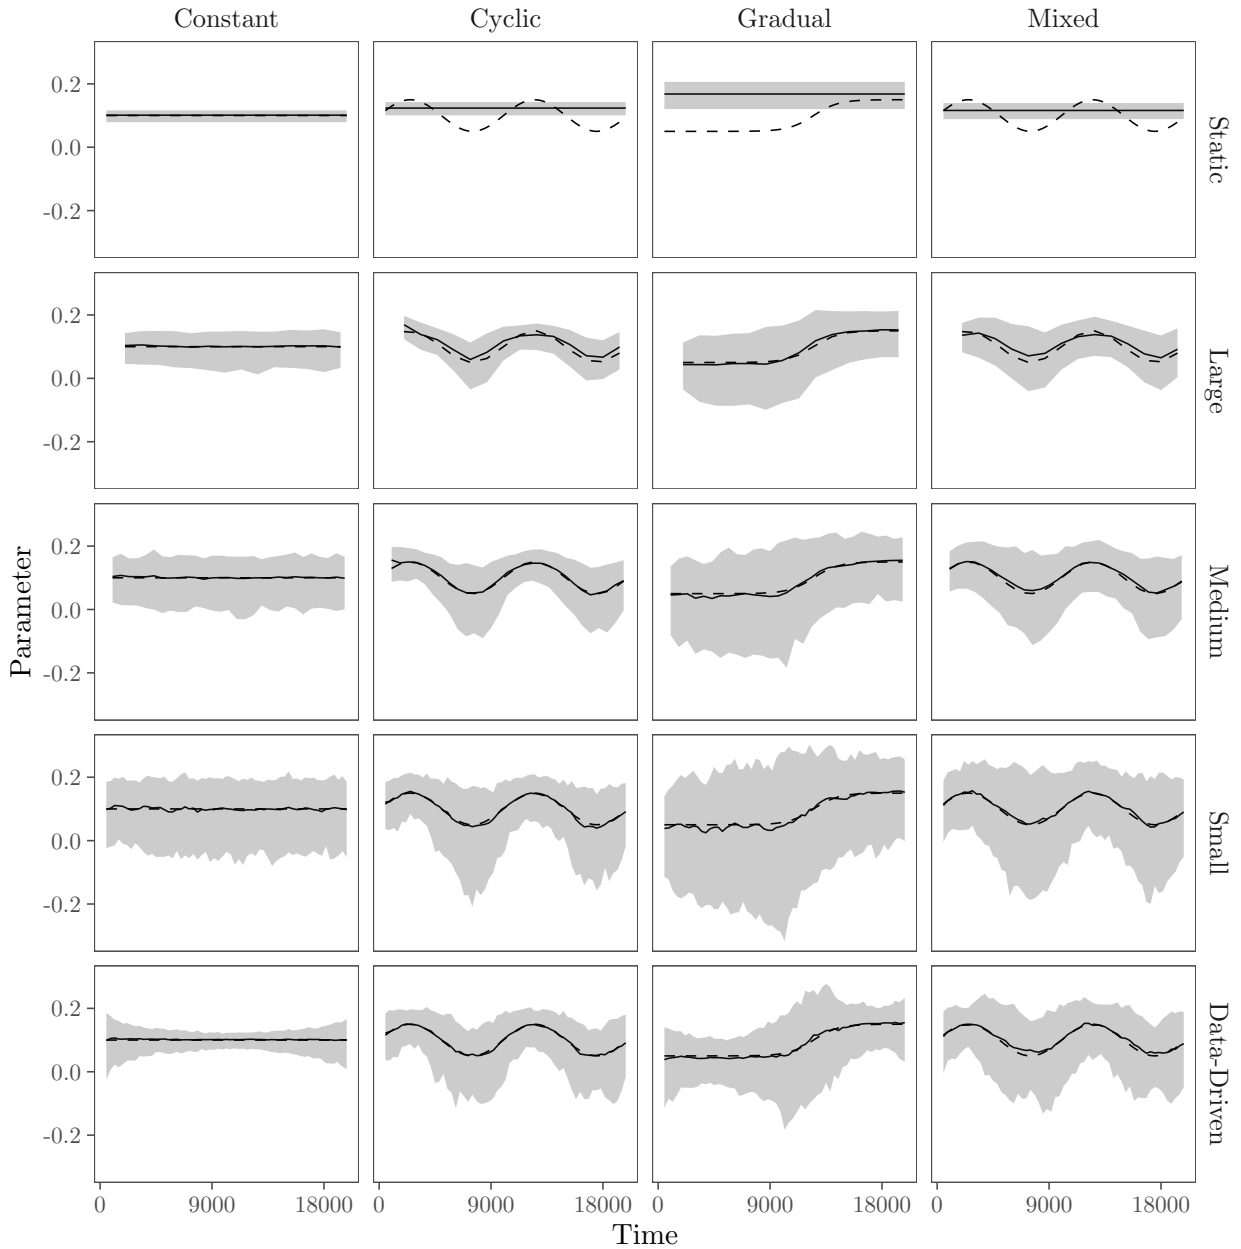

**Fig 10. Results from the evaluation of the (moving window) REM for the ‘activity’ effect.** Rows show results for estimation of the ‘activity’ effect with the ‘static’ REM, large ( $4000t$ ), medium ( $2000t$ ), small ( $1000t$ ), and data-based window widths, respectively. Columns show results for estimation of the ‘activity’ effect in the four time-varying effects scenarios. Solid lines represent the mean estimated parameters over 200 datasets over time. The gray area represents the range with 95% of the estimates for the 200 datasets. Dashed lines represent the parameters used for data generation.

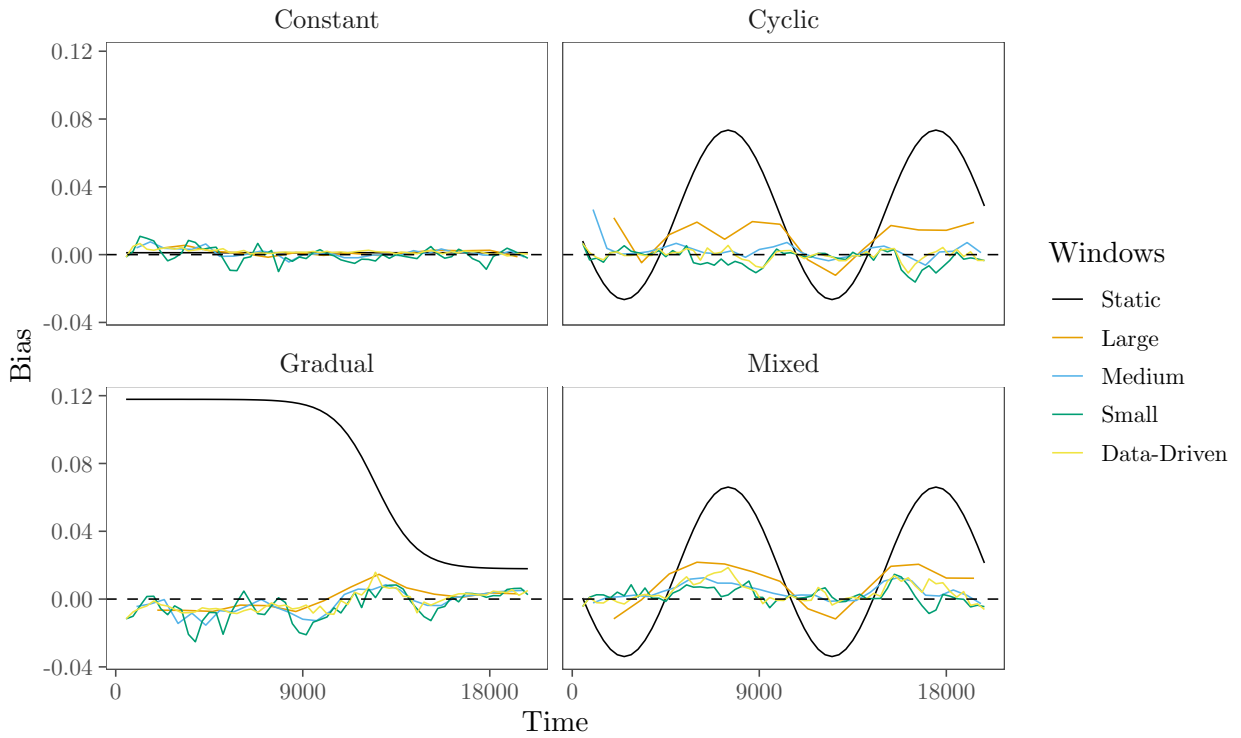

**Fig 11. Results for the ‘activity’ effect from the evaluation of the moving window REM.** Panels refer to the four time-varying effect scenarios. Solid lines represent the bias of the parameter estimates over time, with colors representing estimation with large ( $4000t$ ), medium ( $2000t$ ), small ( $1000t$ ) and data-based window widths.

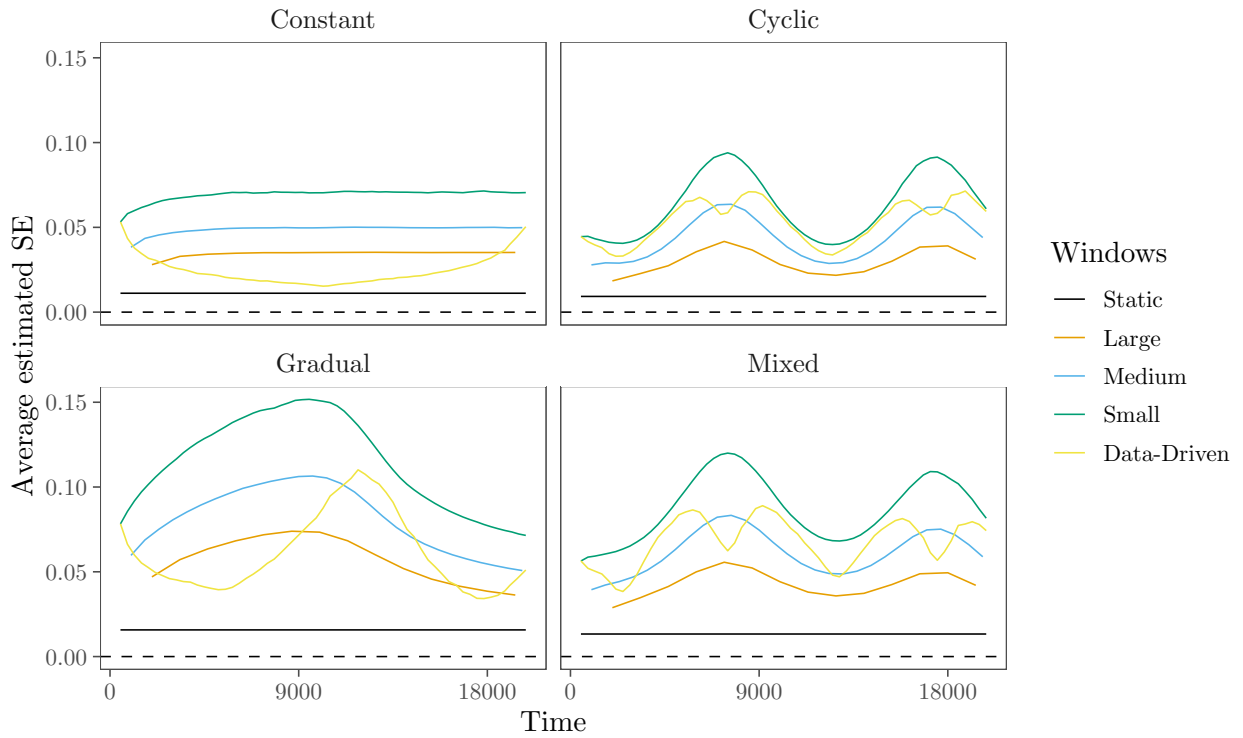

**Fig 12. Results for the ‘activity’ effect from the evaluation of the moving window REM.** Panels refer to the four time-varying effect scenarios. Solid lines represent the average estimated standard error of the parameter estimates over time, with colors representing estimation with large ( $4000t$ ), medium ( $2000t$ ), small ( $1000t$ ) and data-based window widths.

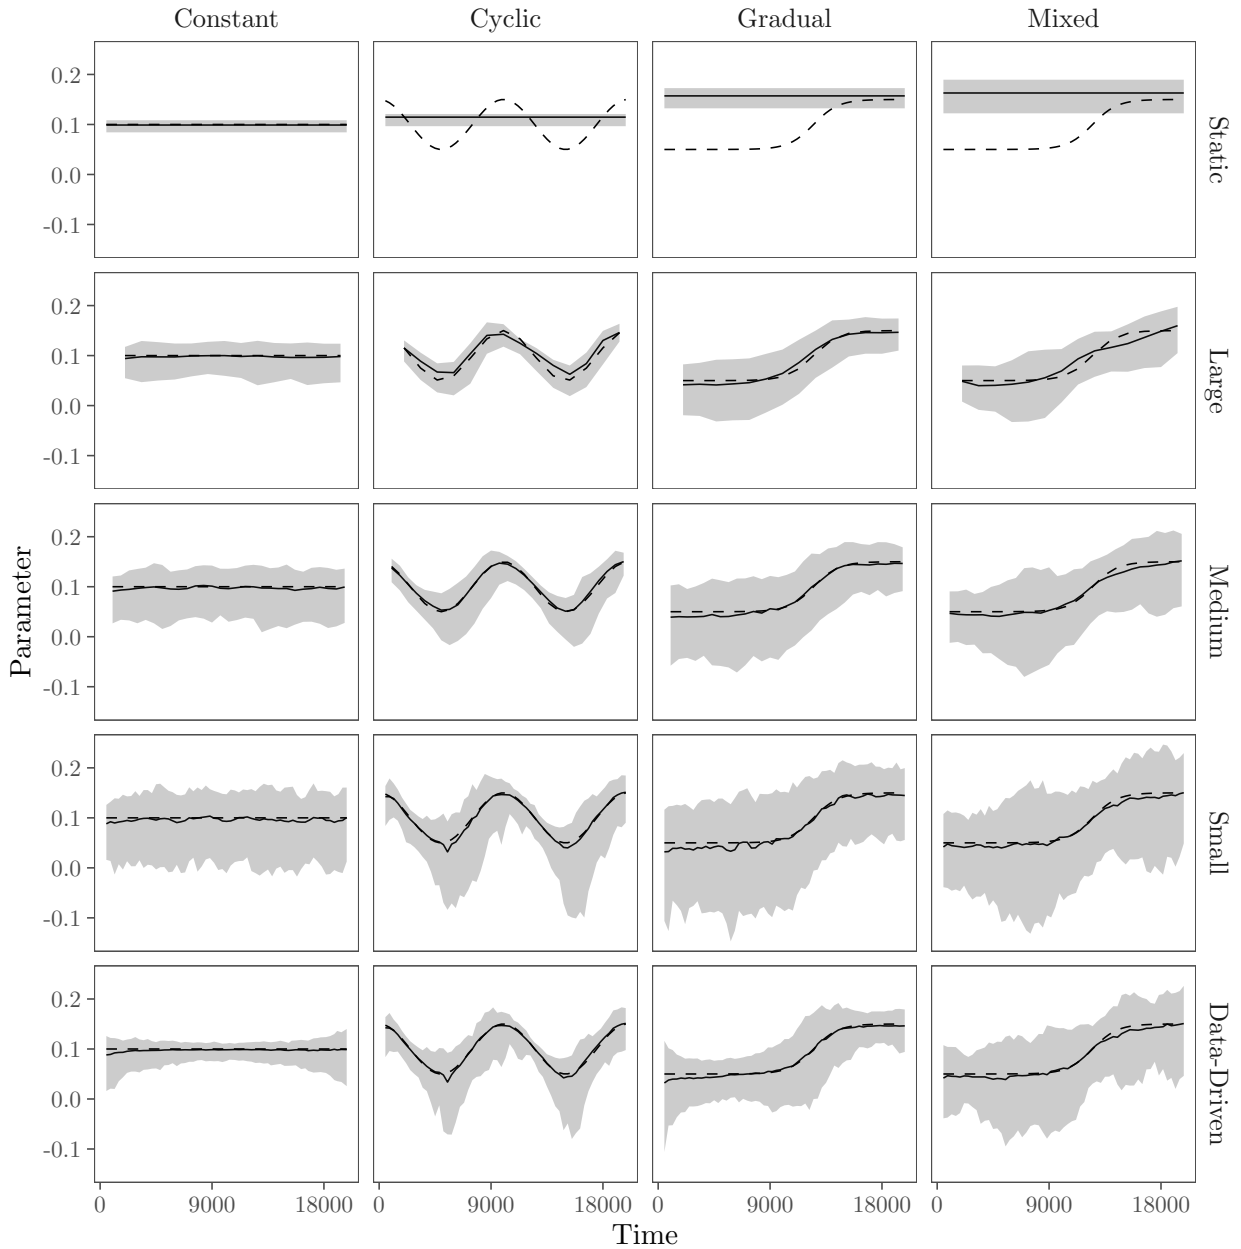

**Fig 13. Results from the evaluation of the (moving window) REM for the ‘inertia’ effect.** Rows show results for estimation of the ‘inertia’ effect with the ‘static’ REM, large (4000t), medium (2000t), small (1000t), and data-based window widths, respectively. Columns show results for estimation of the ‘inertia’ effect in the four time-varying effects scenarios. Solid lines represent the mean estimated parameters over 200 datasets over time. The gray area represents the range with 95% of the estimates for the 200 datasets. Dashed lines represent the parameters used for data generation.

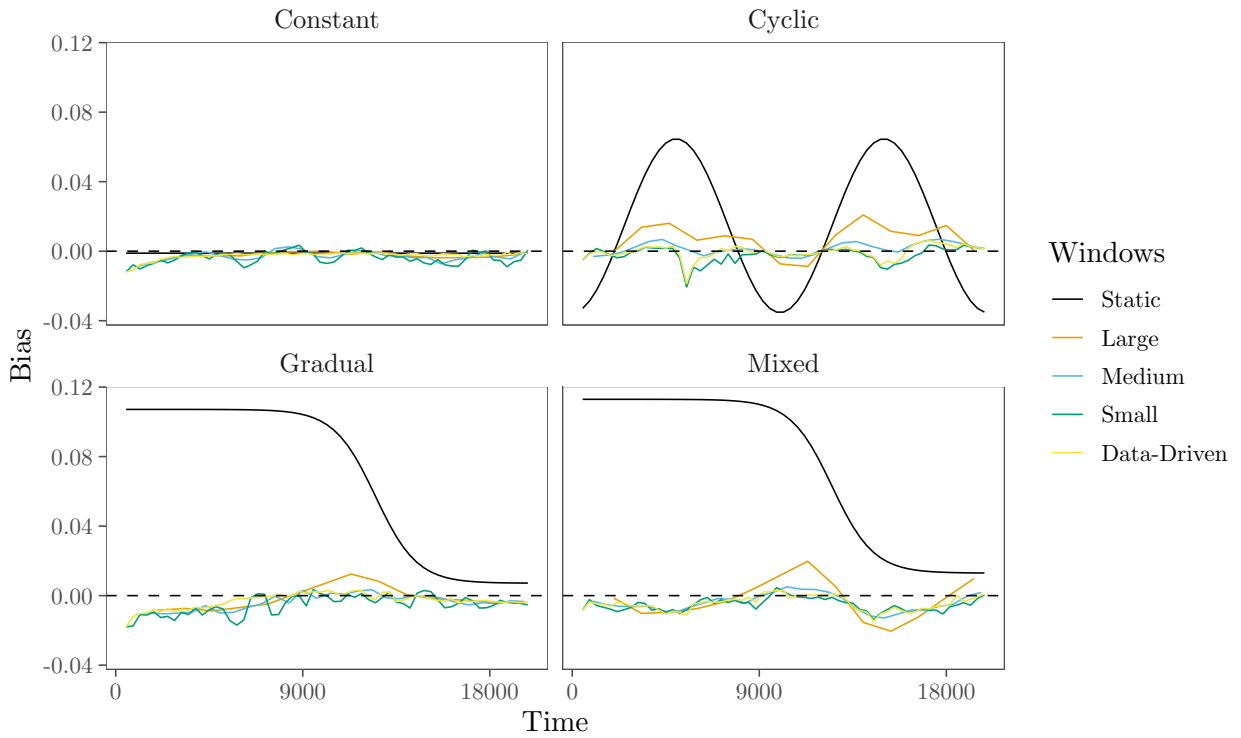

**Fig 14. Results for the ‘inertia’ effect from the evaluation of the moving window REM.** Panels refer to the four time-varying effect scenarios. Solid lines represent the bias of the parameter estimates over time, with colors representing estimation with large ( $4000t$ ), medium ( $2000t$ ), small ( $1000t$ ) and data-based window widths.

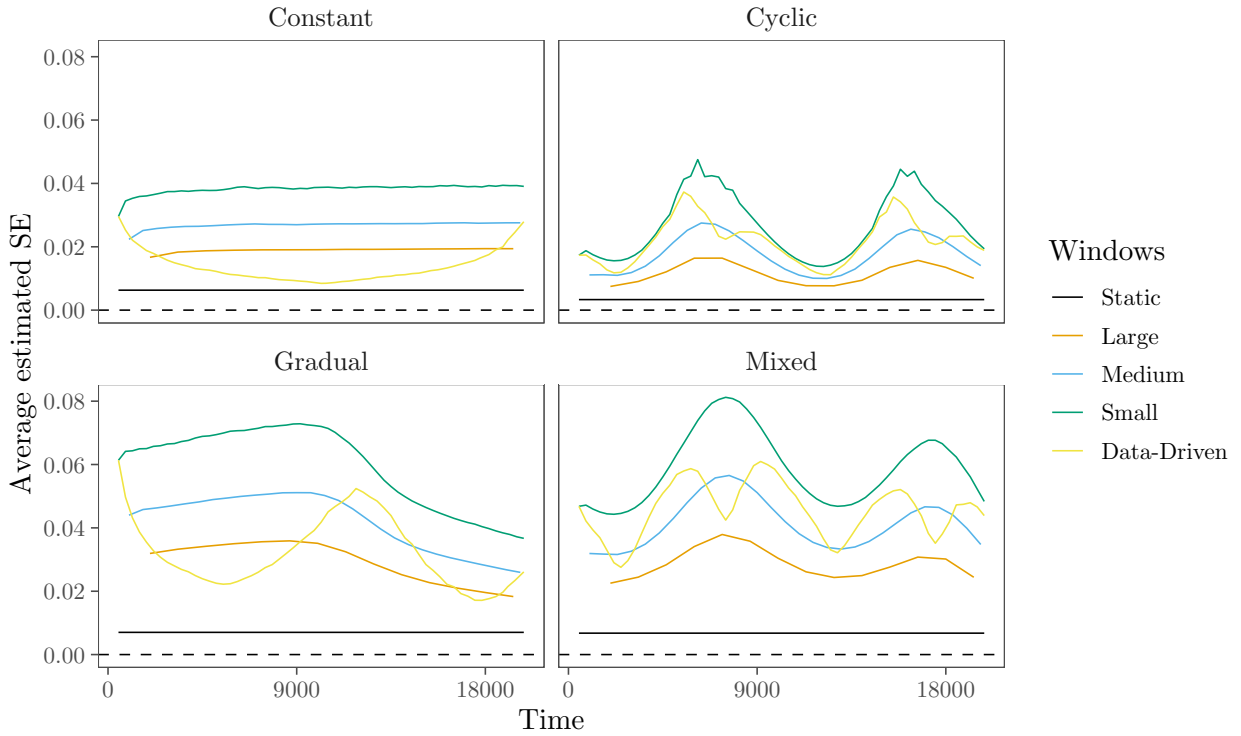

**Fig 15. Results for the ‘inertia’ effect from the evaluation of the moving window REM.** Panels refer to the four time-varying effect scenarios. Solid lines represent the average estimated standard error of the parameter estimates over time, with colors representing estimation with large ( $4000t$ ), medium ( $2000t$ ), small ( $1000t$ ) and data-based window widths.



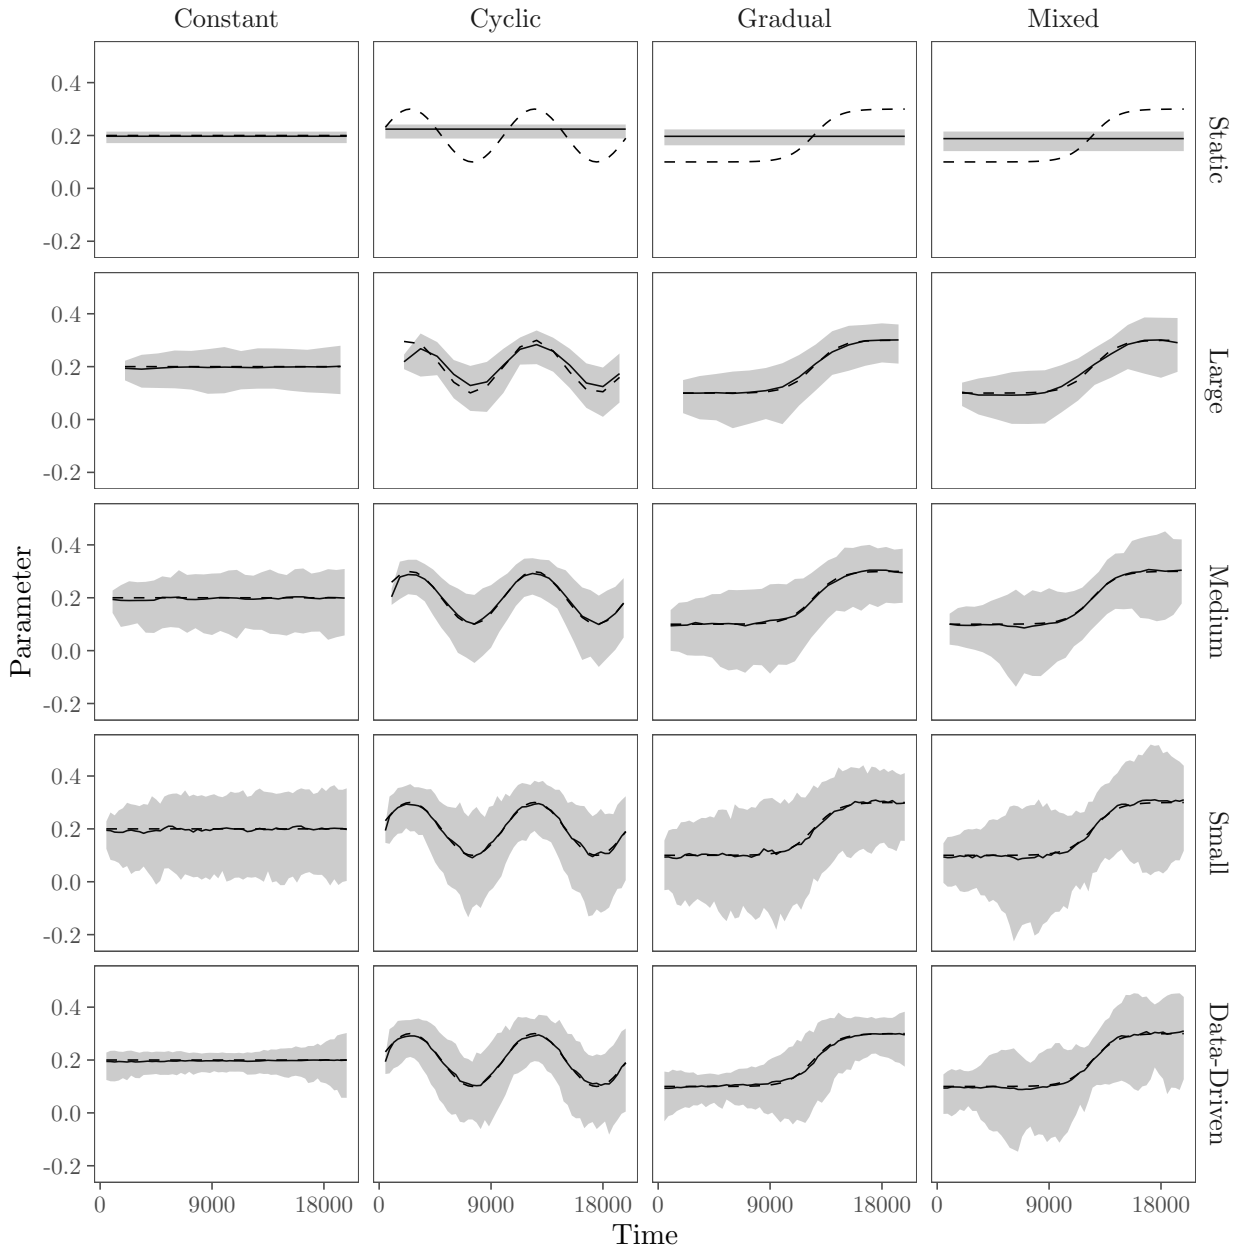

**Fig 16. Results from the evaluation of the (moving window) REM for the ‘transitivity’ effect.** Rows show results for estimation of the ‘transitivity’ effect with the ‘static’ REM, large ( $4000t$ ), medium ( $2000t$ ), small ( $1000t$ ), and data-based window widths, respectively. Columns show results for estimation of the ‘transitivity’ effect in the four time-varying effects scenarios. Solid lines represent the mean estimated parameters over 200 datasets over time. The gray area represents the range with 95% of the estimates for the 200 datasets. Dashed lines represent the parameters used for data generation.

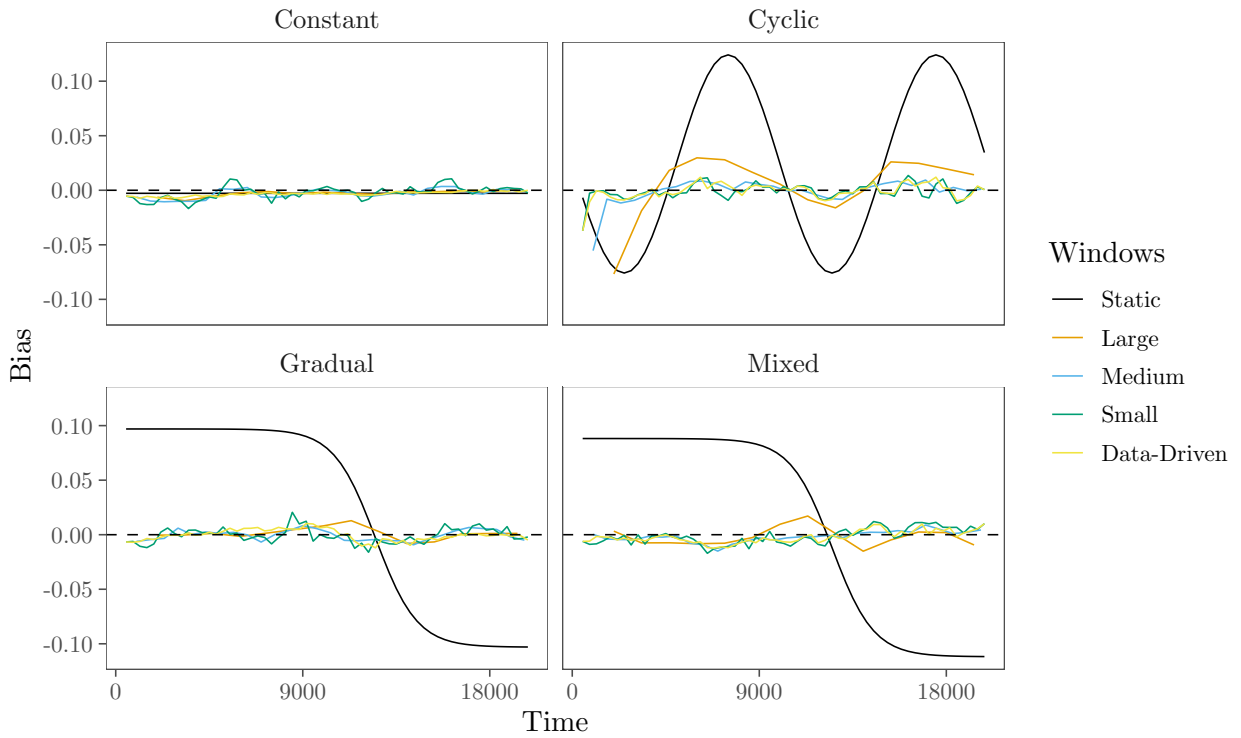

**Fig 17. Results for the ‘transitivity’ effect from the evaluation of the moving window REM.** Panels refer to the four time-varying effect scenarios. Solid lines represent the bias of the parameter estimates over time, with colors representing estimation with large ( $4000t$ ), medium ( $2000t$ ), small ( $1000t$ ) and data-based window widths.

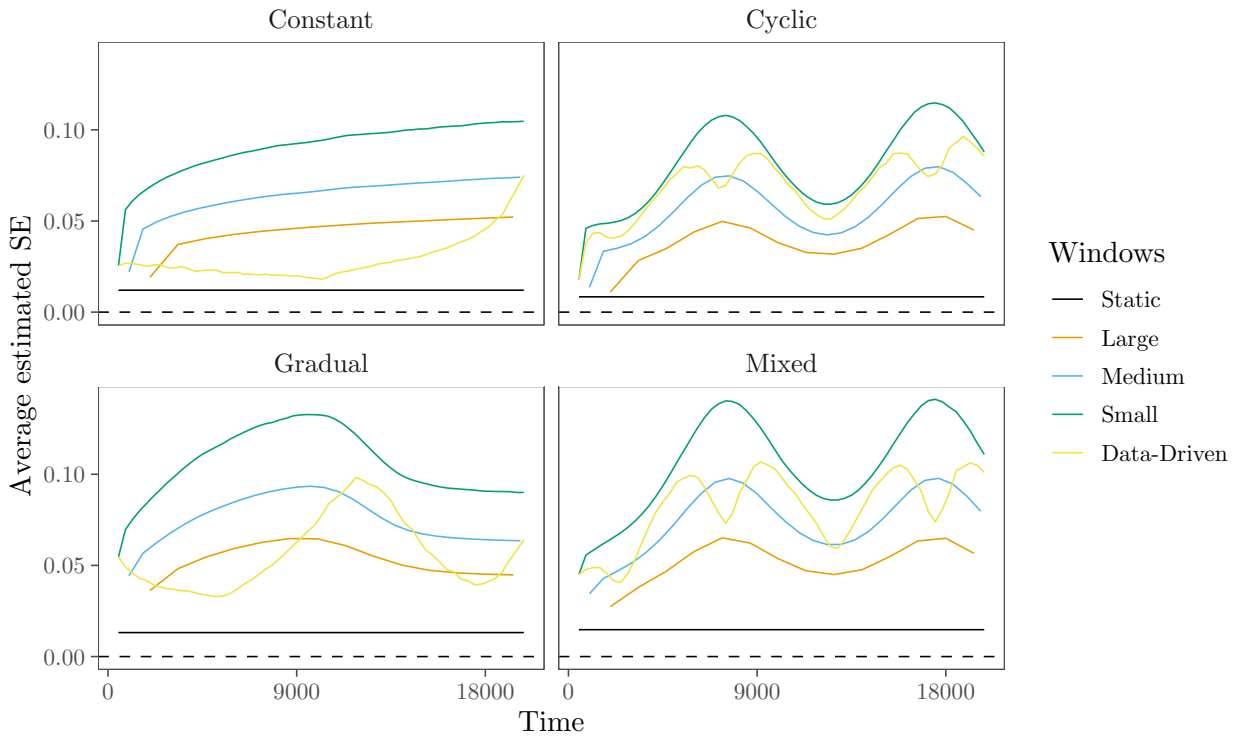

**Fig 18. Results for the ‘transitivity’ effect from the evaluation of the moving window REM.** Panels refer to the four time-varying effect scenarios. Solid lines represent the average estimated standard error of the parameter estimates over time, with colors representing estimation with large ( $4000t$ ), medium ( $2000t$ ), small ( $1000t$ ) and data-based window widths.
